# Supplementary material for: Translational control and Rho-dependent transcription termination are intimately linked in riboswitch regulation
Source: PubMed Central journal article supplement — Nucleic Acids Res. 2017 May 18;45(12):7474–86. doi: 10.1093/nar/gkx434 (PMC5499598; doi:10.1093/nar/gkx434), 2017-05-18
Supplement: gkx434_Supp.pdf [file gkx434_Supp.pdf]

# **Translational control and Rho-dependent transcription termination are intimately linked in riboswitch regulation**

Laurène Bastet<sup>1</sup>, Adrien Chauvier<sup>1</sup>, Navjot Singh<sup>2</sup>, Antony Lussier<sup>1</sup>, Anne-Marie Lamontagne<sup>1</sup>, Karine Prévost<sup>3</sup>, Eric Massé<sup>3</sup>, Joseph T. Wade<sup>2,4</sup> and Daniel A. Lafontaine<sup>1,\*</sup>

<sup>1</sup> Department of Biology, Faculty of Sciences, RNA Group, Université de Sherbrooke, Sherbrooke, Quebec, Canada, J1K 2R1.

<sup>2</sup> Wadsworth Center, New York State Department of Health, Albany, NY, 12208, USA.

<sup>3</sup> Department of Biochemistry, Faculty of Medicine and Health Sciences, RNA Group, Université de Sherbrooke, Sherbrooke, Quebec, Canada, J1E 4K8.

<sup>4</sup> Department of Biomedical Sciences, University at Albany, Albany, NY, 12201, USA.

\* To whom correspondence should be addressed. Tel: 819-821-8000, ext:65011; Fax: 819-821-8049; Email: Daniel.Lafontaine@USherbrooke.ca.

## **SUPPLEMENTARY INFORMATION**

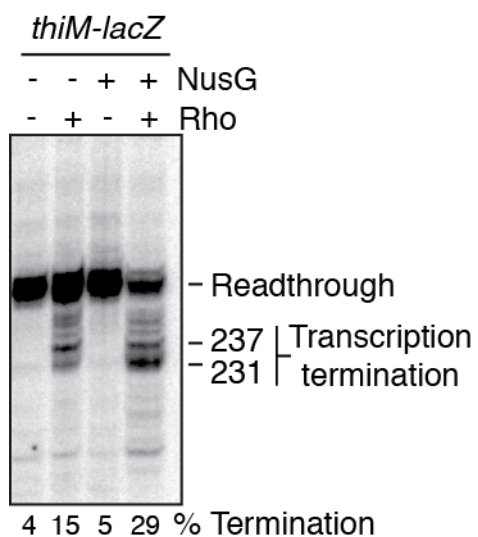

**Supplementary Figure S1. Rho-mediated transcription termination using a *thiM-lacZ* fusion.**

*In vitro* Rho-dependent transcriptions performed using the *thiM-lacZ* transcriptional fusion. Transcriptions were done in the absence (-) or presence (+) of 50 nM NusG or 50 nM Rho. Readthrough and termination transcripts are indicated at the right. Termination efficiencies are indicated below.

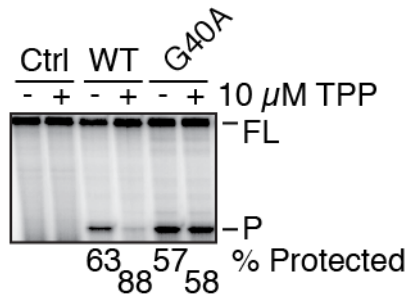

**Supplementary Figure S2. RNase H cleavage assays monitoring TPP-induced structural modulation of the *thiM*-riboswitch.**

*In vitro* RNase H assays performed using the *thiM*-riboswitch in the absence (-) or presence (+) of 100  $\mu$ M TPP. Full-length (FL) and cleavage product (P) are indicated at the right. Protection efficiencies are indicated below. Absence of products is observed in the absence of RNase H (Ctrl).

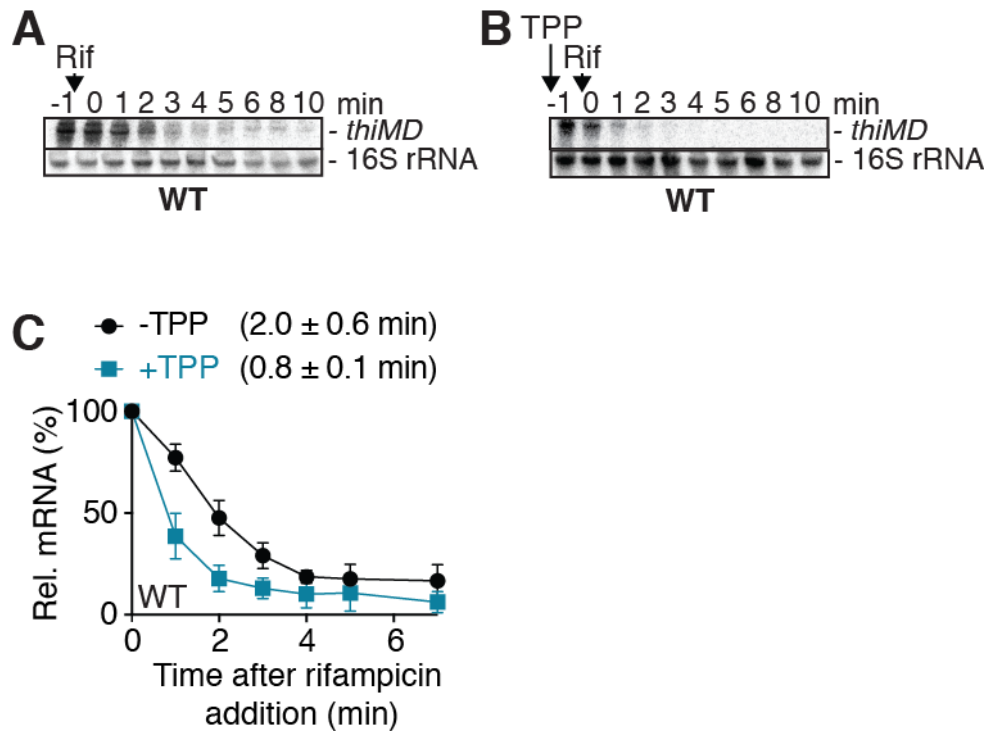

**Supplementary Figure S3. Study of *thiMD* mRNA stability as a function of TPP.**

(A and B) Northern blot analysis of *thiMD* mRNA levels in the context of the wild-type strain. The strain was grown to mid-log phase in M63 minimal medium with 0.2% glucose at 37°C and total RNA was isolated at different times before (-1) and after (0) the addition of rifampicin (250 µg/mL). The experiment was performed in the absence (A) or presence of 500 µg/mL TPP (B). The loading control was 16S rRNA. (C) Quantification analysis of Northern blots shown in panels A and B. The quantification represents the stability of the full-length *thiMD* mRNA in the context of the wild-type strain. Half-lives obtained in the absence and presence of TPP are indicated. The average values of three independent experiments with SDs are shown.

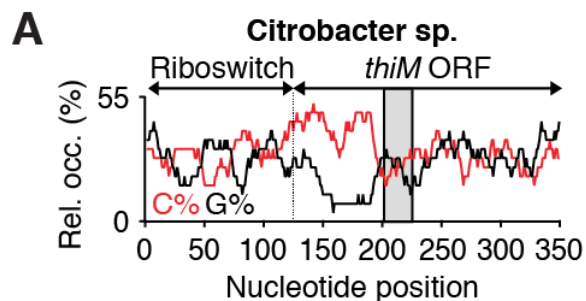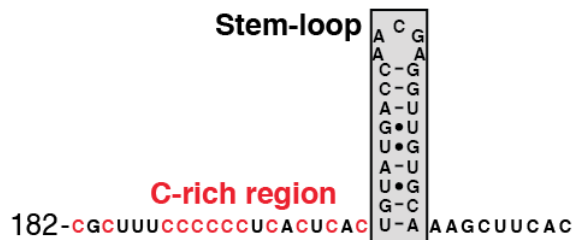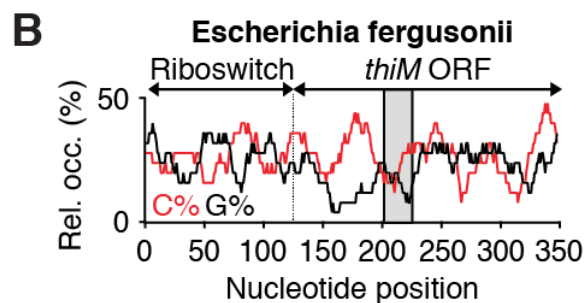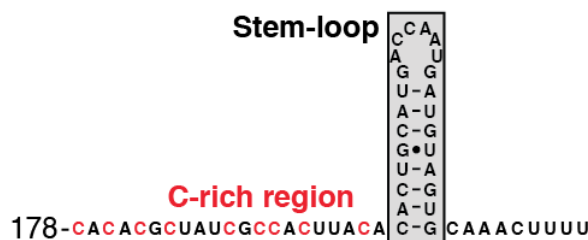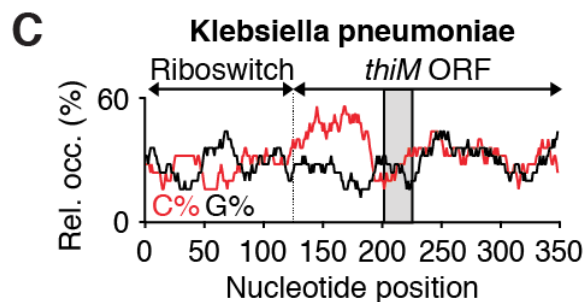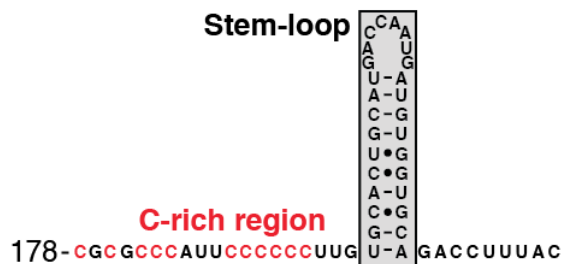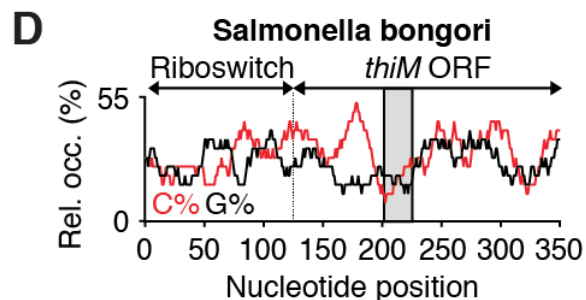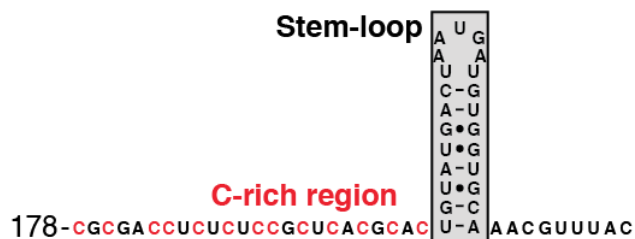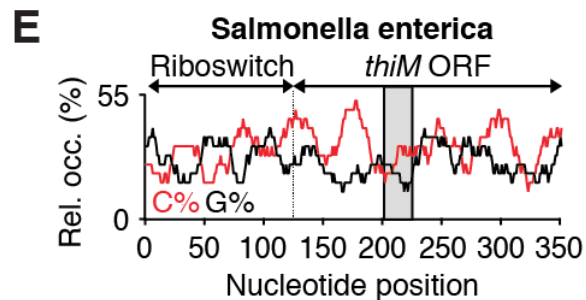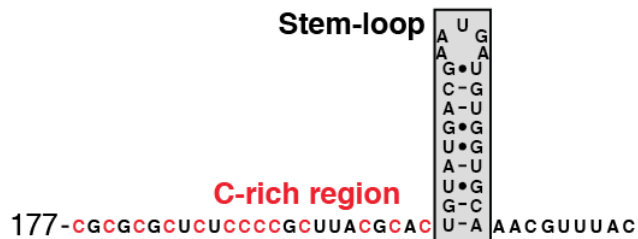

**Supplementary Figure S4. The region important for Rho transcription termination is conserved across various bacterial species.**

(A to E) Sequence analysis of *thiM* in *Citrobacter* sp. (A), *Escherichia fergusonii* (B), *Klebsiella pneumoniae* (C), *Salmonella bongori* (D) and *Salmonella enterica* (E). In each case, the left panel shows the relative occurrence (Rel. occ.) of cytosine (C%) and guanine (G%) in the upstream region of the *thiM* sequence. A scanning window of 25 nt was used to determine C and G occurrences and the shaded region represents the position of the stem-loop. Right panels show a portion of the C-rich region and the secondary structure of the stem-loop, which is based on mfold analysis (1).

**Supplementary Table S1. Summary of strains/plasmids used in this study.**

| Strains | Relevant marker                                                                        | References            |
|---------|----------------------------------------------------------------------------------------|-----------------------|
| AM147   | JW5741-1(11550), rnr-729(del)::kan,<br>BL21(DE3) pIA247 (nusG)<br>BL21(DE3) pET28b-rho | CGSC, Yale            |
| BTU1    | PM1205 lacI':PBAD-BtuB <sub>6cd</sub>                                                  | This study            |
| BTU2    | PM1205 lacI':PBAD-btuB <sub>6cd</sub>                                                  | This study            |
| CRB016  | MG1655 rho-R66S ilvD500::Tn10                                                          | Laboratory collection |
| DAL1    | BL21(DE3) F <sub>-ompT hsdS(rB- mB-)</sub> gal dcm λ(DE3)                              | Laboratory collection |
| DAL2    | JW1279-1 (99150) Δrnb-723::kan,                                                        | CGSC, Yale            |
| EM1055  | MG1655 ΔlacZ X174                                                                      | (2)                   |
| EM1047  | DH5-alpha + pACYC184                                                                   | Laboratory collection |
| EM1237  | DY330 [W3110 delta-lacU169 gal490 lambda-cl857<br>delta-(cro-bioA)]                    | (3)                   |
| EM1321  | EM1055 rnc14 [P1 from EM1320]                                                          | Laboratory collection |
| JF185   | EM1055 rppH::Tet                                                                       | Laboratory collection |
| KP1487  | thiM-lacZ <sub>34cd</sub> (250) trx                                                    | This study            |
| KP1500  | rhoR66S Tn10                                                                           | This study            |
| KP1502  | thiM-lacZ <sub>34cd</sub> (250) trx rhoR66S Tn10                                       | KP1487 + P1(KP1500)   |
| PM1205  | lacI':P <sub>BAD</sub> -cat-sacB-lacZ, mini tet <sup>R</sup>                           | (4)                   |
| TPP3    | PM1205 lacI':PBAD-thiM <sub>6cd</sub>                                                  | (5)                   |
| TPP4    | PM1205 lacI':PBAD-ThiM <sub>6cd</sub>                                                  | (5)                   |
| TPP5    | PM1205 lacI':PBAD-thiM <sub>50cd</sub>                                                 | This study            |
| TPP9    | PM1205 lacI':PBAD-thiM <sub>10cd</sub>                                                 | This study            |
| TPP10   | PM1205 lacI':PBAD-thiM <sub>20cd</sub>                                                 | This study            |
| TPP12   | PM1205 lacI':PBAD-thiM <sub>100cd</sub>                                                | This study            |
| TPP13   | PM1205 lacI':PBAD-thiM <sub>167cd</sub>                                                | This study            |
| TPP14   | PM1205 lacI':PBAD-thiM <sub>34cd</sub> mutRBS                                          | This study            |
| TPP15   | PM1205 lacI':PBAD-thiM <sub>34cd</sub> mutAUG                                          | This study            |
| TPP16   | PM1205 lacI':PBAD-thiM <sub>6cd</sub> mutRBS                                           | This study            |
| TPP17   | PM1205 lacI':PBAD-thiM <sub>6cd</sub> mutAUG                                           | This study            |
| TPP18   | PM1205 lacI':PBAD-ThiM <sub>6cd</sub> mutRBS                                           | This study            |
| TPP19   | PM1205 lacI':PBAD-ThiM <sub>6cd</sub> mutAUG                                           | This study            |
| TPP20   | PM1205 lacI':PBAD-btuBthiM                                                             | This study            |
| TPP21   | PM1205 lacI':PBAD-thiM <sub>34cd</sub> M3                                              | This study            |
| TPP22   | PM1205 lacI':PBAD-thiM <sub>34cd</sub> M2                                              | This study            |
| TPP23   | PM1205 lacI':PBAD-thiM <sub>34cd</sub> M1                                              | This study            |
| TPP24   | PM1205 lacI':PBAD-thiM <sub>50cd</sub> M4                                              | This study            |
| TPP25   | PM1205 lacI':PBAD-thiM <sub>50cd</sub> M5                                              | This study            |
| TPP29   | PM1205 lacI':PBAD-thiM <sub>50cd</sub> M2                                              | This study            |
| TPP30   | PM1205 lacI':PBAD-thiM <sub>100cd</sub> M2                                             | This study            |
| TPP31   | PM1205 lacI':PBAD-thiM <sub>167cd</sub> M2                                             | This study            |
| TPP32   | PM1205 lacI':PBAD-thiM <sub>34cd</sub> M6                                              | This study            |
| TPP33   | PM1205 lacI':PBAD-thiM <sub>34cd</sub> M7                                              | This study            |

**Supplementary Table S2. Summary of *lacZ* fusions used in this study.**

| Strains                                                    | Construct                          | Oligonucleotides                                                                         |
|------------------------------------------------------------|------------------------------------|------------------------------------------------------------------------------------------|
| <b>Transcriptional and translational fusions in PM1205</b> |                                    |                                                                                          |
| BTU1                                                       | BtuB <sub>6cd</sub>                | LB18-LB19 (genomic DNA)                                                                  |
| BTU2                                                       | <i>btuB</i> <sub>6cd</sub>         | LB18-LB20 (genomic DNA)                                                                  |
| TPP3                                                       | <i>thiM</i> <sub>6cd</sub>         | LB1-LB3 (genomic DNA)                                                                    |
| TPP4                                                       | ThiM <sub>6cd</sub>                | LB1-LB2 (genomic DNA)                                                                    |
| TPP5                                                       | <i>thiM</i> <sub>50cd</sub>        | LB1-LB7 (genomic DNA)                                                                    |
| TPP9                                                       | <i>thiM</i> <sub>10cd</sub>        | LB1-LB4 (genomic DNA)                                                                    |
| TPP10                                                      | <i>thiM</i> <sub>21cd</sub>        | LB1-LB5 (genomic DNA)                                                                    |
| TPP11                                                      | <i>thiM</i> <sub>34cd</sub>        | LB1-LB6 (genomic DNA)                                                                    |
| TPP12                                                      | <i>thiM</i> <sub>100cd</sub>       | LB1-LB8 (genomic DNA)                                                                    |
| TPP13                                                      | <i>thiM</i> <sub>167cd</sub>       | LB1-LB9 (genomic DNA)                                                                    |
| TPP14                                                      | <i>thiM</i> <sub>34cd</sub> mutRBS | PCR1: LB1-LB11 (genomic DNA)<br>PCR2: LB10-LB6 (genomic DNA)<br>PCR3: LB1-LB6 (PCR1-2)   |
| TPP15                                                      | <i>thiM</i> <sub>34cd</sub> mutAUG | PCR1: LB1-LB12 (genomic DNA)<br>PCR2: LB13-LB6 (genomic DNA)<br>PCR3: LB1-LB6 (PCR1-2)   |
| TPP16                                                      | <i>thiM</i> <sub>6cd</sub> mutRBS  | LB1-LB3 ( <i>thiM</i> <sub>34cd</sub> mutRBS)                                            |
| TPP17                                                      | <i>thiM</i> <sub>6cd</sub> mutAUG  | LB1-LB15 ( <i>thiM</i> <sub>34cd</sub> mutAUG)                                           |
| TPP18                                                      | ThiM <sub>6cd</sub> mutRBS         | LB1-LB2 ( <i>thiM</i> <sub>34cd</sub> mutRBS)                                            |
| TPP19                                                      | ThiM <sub>6cd</sub> mutAUG         | LB1-LB14 ( <i>thiM</i> <sub>34cd</sub> mutAUG)                                           |
| TPP20                                                      | <i>btuBthiM</i>                    | PCR1: LB18-LB17 (genomic DNA)<br>PCR2: LB16-LB6 (genomic DNA)<br>PCR3: LB18-LB6 (PCR1-2) |
| TPP21                                                      | <i>thiM</i> <sub>34cd</sub> M3     | PCR1: LB1-LB21 (genomic DNA)<br>PCR2: LB22-LB6 (genomic DNA)<br>PCR3: LB1-LB6 (PCR1-2)   |
| TPP22                                                      | <i>thiM</i> <sub>34cd</sub> M2     | PCR1: LB1-LB24 (genomic DNA)<br>PCR2: LB23-LB6 (genomic DNA)<br>PCR3: LB1-LB6 (PCR1-2)   |
| TPP23                                                      | <i>thiM</i> <sub>34cd</sub> M1     | PCR1: LB1-LB26 (genomic DNA)<br>PCR2: LB25-LB6 (genomic DNA)<br>PCR3: LB1-LB6 (PCR1-2)   |
| TPP24                                                      | <i>thiM</i> <sub>50cd</sub> M4     | PCR1: LB1-LB28 (genomic DNA)<br>PCR2: LB27-LB7 (genomic DNA)<br>PCR3: LB1-LB7 (PCR1-2)   |
| TPP25                                                      | <i>thiM</i> <sub>50cd</sub> M5     | PCR1: LB1-LB30 (genomic DNA)<br>PCR2: LB29-LB7 (genomic DNA)<br>PCR3: LB1-LB7 (PCR1-2)   |
| TPP29                                                      | <i>thiM</i> <sub>50cd</sub> M3     | LB1-LB7 ( <i>thiM</i> <sub>167cd</sub> M3)                                               |
| TPP30                                                      | <i>thiM</i> <sub>100cd</sub> M3    | LB1-LB8 ( <i>thiM</i> <sub>167cd</sub> M3)                                               |
| TPP31                                                      | <i>thiM</i> <sub>167cd</sub> M3    | PCR1: LB1-LB24 (genomic DNA)<br>PCR2: LB23-LB9 (genomic DNA)<br>PCR3: LB1-LB9 (PCR1-2)   |
| TPP32                                                      | <i>thiM</i> <sub>34cd</sub> M6     | PCR1: LB1-LB48 (genomic DNA)<br>PCR2: LB49-LB9 (genomic DNA)<br>PCR3: LB1-LB6 (PCR1-2)   |
| TPP33                                                      | <i>thiM</i> <sub>34cd</sub> M7     | PCR1: LB1-LB50 (genomic DNA)<br>PCR2: LB51-LB9 (genomic DNA)<br>PCR3: LB1-LB6 (PCR1-2)   |



**Supplementary Table S3. PCR constructs used for *in vitro* RNA synthesis.**

| <b>Constructions</b>                        | <b>Oligonucleotides</b>                                                              |
|---------------------------------------------|--------------------------------------------------------------------------------------|
| <b><i>In vitro</i> transcription assays</b> |                                                                                      |
| <i>PlacUV5thiM<sub>34cd</sub>lacZ</i>       | PCR1: LB45-LB46 (Strain TPP11)<br>PCR2: AC1-LB65 (PCR1)                              |
| <i>PlacUV5thiM<sub>300</sub></i>            | AC1-AC4 (genomic DNA)                                                                |
| <i>PlacUV5thiM<sub>300</sub>-G40A</i>       | PCR1: AC1-AC5 (genomic DNA)<br>PCR2: AC6-AC4 (genomic DNA)<br>PCR3: AC1-AC4 (PCR1-2) |
| <i>PlacUV5thiM<sub>400</sub></i>            | AC1-AC2 (genomic DNA)                                                                |
| <b>Northern Blot RNA probes</b>             |                                                                                      |
| <i>thiM</i> probe                           | LB39-LB40 (genomic DNA)                                                              |
| <i>thiD</i> probe                           | LB41-LB42 (genomic DNA)                                                              |
| 16S RNA probe                               | EM293-EM294 (genomic DNA)                                                            |

**Supplementary Table S4. Summary of oligonucleotides used in this study.**

| Oligonucleotides | Sequence 5'-3'                                                             |
|------------------|----------------------------------------------------------------------------|
| 130              | GCCATAACGT                                                                 |
| 201              | TTGGTGAAAA                                                                 |
| AC1              | GGGCACCCCAGGCTTTACACTTTATGCTTCCGGCTCGTATAATGTGTGGCTGCG<br>ATTTATCATCGCAACC |
| AC2              | CACGCATCGCCTGAGCGCGT                                                       |
| AC3              | CCGAGTCGTT                                                                 |
| AC4              | CATCGCTGGCGATGCACCGAG                                                      |
| AC5              | ACGGGTATTTCTTAGCCTTCACGCA                                                  |
| AC6              | TGCGTGAAGGCTAAGAAATACCCGT                                                  |
| EM293            | TAATACGACTCACTATAGGGAGACGCTTTACGCCAGTAATTCC                                |
| EM294            | CTCCTACGGGAGGCAGCAGT                                                       |
| LB1              | ACCTGACGCTTTTTATCGCAACTCTCTACTGTTTCTCCATGATTTATCATCGCAAC<br>CAAAC          |
| LB2              | TAACGCCAGGGTTTTCCAGTCACGACGTTGTAAAACGACCAGCAGGTGACTT<br>GCATAG             |
| LB3              | GTGTGATAAAGAAAGTAAAATGCCGGATCCAGCAGGTGACTTGCATAG                           |
| LB4              | GTGTGATAAAGAAAGTAAAATGCCGGATCCGCAGATTGCGCTGAACC                            |
| LB5              | GTGTGATAAAGAAAGTAAAATGCCGGATCCGCAGATTGCGCTGAACC                            |
| LB6              | GTGTGATAAAGAAAGTAAAATGCCGGATCTTGACCACATCATTGGTCAT                          |
| LB7              | GTGTGATAAAGAAAGTAAAATGCCGGATCCATCGCTGGCGATGCACCGAG                         |
| LB8              | GTGTGATAAAGAAAGTAAAATGCCGGATCTGGATCAAGCGTCCAGGGTGT                         |
| LB9              | GTGTGATAAAGAAAGTAAAATGCCGGATCGATTGCGCCAGTTTCCCGTGC                         |
| LB10             | TATGGCAGCAGCAAACCTATGCAAGTCG                                               |
| LB11             | CGACTTGCATAGTTTGCTGCTGCCATA                                                |
| LB12             | GGAGCAAACCTATACAAGTCGAC                                                    |
| LB13             | GTCGACTTGTATAGTTTGCTCC                                                     |
| LB14             | TAACGCCAGGGTTTTCCAGTCACGACGTTGTAAAACGACCAGCAGGTGACTT<br>GCTTAG             |
| LB15             | GTGTGATAAAGAAAGTAAAATGCCGGATCCAGCAGGTGACTTGCCTAG                           |
| LB16             | AAAAGCCGGTCAATCTGCGCACGCGTTACACCT                                          |
| LB17             | GTGCGCAGATTGACCGGCTTTTTTAATCATTGTAAAG                                      |
| LB18             | ACCTGACGCTTTTTATCGCAACTCTCTACTGTTTCTCCATGCCGGTCTGTGAGT<br>TAATAG           |
| LB19             | TAACGCCAGGGTTTTCCAGTCACGACGTTGTAAAACGACCGAAGCTTTTTTAAT<br>CATTGTAAAGC      |
| LB20             | GTGTGATAAAGAAAGTAAAATGCCGGATCCGAAGCTTTTTTAATCATTGTAAAGC                    |
| LB21             | GTCATGCAGTGACAGGGGAATGTTGGTGAAAAAGGTG                                      |
| LB22             | CATTCCCCTGTGCACTGCATGACCAATGATGTGGTGC                                      |
| LB23             | CCAACATTCCCCGGTTGTGCACTGCATGACCAATGATG                                     |
| LB24             | CAGTGACAACCGGGGAATGTTGGTGAAAAAGGTG                                         |
| LB25             | CCCCTCGGGTGCATGACCAATG                                                     |
| LB26             | CAGTGACCCCGAGGGGAATGTTGGTGAAAAAGG                                          |
| LB27             | GATGTGGTGCAAACCGCCAATACCTTGCTGGCGCTC                                       |
| LB28             | GTATTGGCGGTTTGCACCACATCATTGGTCATGCAG                                       |
| LB29             | GCAATGGTTTACCGCCAATACCTTGCTGGCGC                                           |
| LB30             | GGCGGTAAACCATTGCACCACATCATTGGTCATGCAGTG                                    |

LB39 AATAATACGACTCACTATAGGGTGGATCAAGCGTCCAGGGTGTGTTG  
 LB40 CCTTTACGCCAATACCTTGCTG  
 LB41 AATAATACGACTCACTATAGGGCGCCGCTTTTTGCCAGCATAACGG  
 LB42 GGCGTACAGTCGGTGTATCGCA  
 LB45 GAATCTGGTGTATATGGCGAGC  
 LB46 GGGGGATGTGCTGCAAGGC  
 LB47 TAACGCCAGGGTTTTCCAGTCACGACGTTGTAAAACGACCATAGCTGTTTCCTG  
 TGTGATAAAGAAAGTTAAAATGCCGGATC  
 LB48 CAAGAGGGGAAAAAAGGTGTAACGCGTGCGCAGATTGCG  
 LB49 CGCGTTACACCTTTTTCCCTCTTGTGCACTGCATGACC  
 LB50 CAAGACCCCAATGTTGGTGAAAAAGGTGTAACGCGTG  
 LB51 CAACATTGGGGTCTTGTGCACTGCATGACCAATGATG  
 LB65 AAGAAAGTTAAAATGCCGGATCTTGCACCACATCATTGGTCAT  
 F-rho-UTR CAACGCTTCCCGTTTTATCT  
 R-rho-UTR TTGTGAATGGTATGGCAGGA  
 F-rho-ORF TGTGTGCTGATGGTTCTG  
 R-rho-ORF CTTCTCGATCACCATTTC  
 F-thiM-UTR TGAGAAATACCCGTATCACC  
 R-thiM-UTR GTAAAGGTTTGCACCACATC  
 F-thiM-ORF ATGGACATCGTATCATTGGT  
 R-thiM-ORF GGAAATGTGGAACAAAACCTG  
 F-thiC-UTR TTAATCTGCTATCGCATCG  
 R-thiC-UTR ATAAATGCGTTTTGAGTTGG  
 F-thiC-ORF ACATCTGCCGAAAAATATCA  
 R-thiC-ORF GCTTTTCCACTTCTTCTTCG  
 F-lysC-UTR GGGTGAAAATAGTAGCGAAG  
 R-lysC-UTR TCAGAAAGCACAATATCAGC  
 F-lysC-ORF ATGTACGTAAAGTGATGCGT  
 R-lysC-ORF GGTCCAGATATCAACACGAG  
 F-ribB-UTR GGATGGGAGAGAGTAACGAT  
 R-ribB-UTR GTGCATTTTCAACACGTTT  
 F-ribB-ORF CTTGATGATGAAGACCGTGA  
 R-ribB-ORF TTGGCAGATCGAGTTGTTTA  
 F-mgtA-UTR GTCCCTGCTCAGCTTTATTA  
 R-mgtA-UTR GACCACCGTATTCAGTGTCT  
 F-mgtA-ORF CGCTGATTGTGCATATGAT  
 R-mgtA-ORF TCATATACCCTGCCAGAATC  
 F-btuB-UTR CATCTGGTTCTCATCATCG  
 R-btuB-UTR AAAACGGTTAGCAGTAACGA  
 F-btuB-ORF GTATGACTTCGACTGGGGTA  
 R-btuB-ORF GCAGTTTGGTAGCCATAGAC  
 F-thiB-UTR GAGAAAATACCCGTGCAAC  
 R-thiB-UTR GCCAAGGAATCGTAGGTAT  
 F-thiB-ORF CCTGAAAGAACTGGTTGAGA  
 R-thiB-ORF TGGTGTAACCTCAGTACCAGA



## Supplementary References

1. Zuker,M. (2003) Mfold web server for nucleic acid folding and hybridization prediction. *Nucleic Acids Res*, **31**, 3406–3415.
2. Masse,E. and Gottesman,S. (2002) A small RNA regulates the expression of genes involved in iron metabolism in *Escherichia coli*. *Proc Natl Acad Sci U S A*, **99**, 4620–4625.
3. Yu,D., Ellis,H.M., Lee,E.C., Jenkins,N.A., Copeland,N.G. and Court,D.L. (2000) An efficient recombination system for chromosome engineering in *Escherichia coli*. *Proc Natl Acad Sci U S A*, **97**, 5978–5983.
4. Mandin,P. and Gottesman,S. (2009) A genetic approach for finding small RNAs regulators of genes of interest identifies RybC as regulating the DpiA/DpiB two-component system. *Mol Microbiol*, **72**, 551–565.
5. Caron,M.P., Bastet,L., Lussier,A., Simoneau-Roy,M., Masse,E. and Lafontaine,D.A. (2012) Dual-acting riboswitch control of translation initiation and mRNA decay. *Proc Natl Acad Sci U S A*, **109**, E3444-53.
